# Supplementary material for: Blood activation and compatibility on single-molecular-layer biointerfaces
Source: Royal Society of Chemistry journal article supplement (doi:10.1039/c4tb00555d), 2014-01-01
Supplement: c4tb00555d1.pdf [file c4tb00555d1.pdf]

## Blood activation and compatibility on single-molecular-layer biointerfaces

Shengqiang Nie,<sup>a,1</sup> Hui Qin,<sup>a,1</sup> Chong Cheng,<sup>a</sup> Weifeng Zhao,<sup>a</sup> Shudong Sun,<sup>a</sup> Baihai Su,<sup>b,\*</sup>  
Changsheng Zhao,<sup>a, c,\*</sup> Zhongwei Gu<sup>c</sup>

<sup>a</sup> College of Polymer Science and Engineering, State Key Laboratory of Polymer Materials Engineering, Sichuan University, Chengdu 610065, People's Republic of China

<sup>b</sup> Department of Nephrology, West China Hospital, Sichuan University, Chengdu 610041, People's Republic of China

<sup>c</sup> National Engineering Research Center for Biomaterials, Sichuan University, Chengdu 610064, People's Republic of China

<sup>1</sup> These two authors contribute equally to this work.

\*Corresponding author. Tel.: +86-28-85400453; fax: +86-28-85405402.

E-mail address: imsbh@163.com (B.H. Su); zhaochsh70@scu.edu.cn or zhaochsh70@163.com (C.S. Zhao).

## Supporting Information

**Table S1** Comparison of elements Si, C, and O on the Si surfaces before and after treating with UV/O<sub>3</sub> detected by XPS (mass fraction).

| Sample               | Si (%) | C (%) | O (%) |
|----------------------|--------|-------|-------|
| Si (before treating) | 56.44  | 15.74 | 27.82 |
| Si (after treating)  | 43.08  | 9.25  | 47.67 |

**Table S2** The contents of elements Si, C, O, N, S, and F on the Si surfaces detected by XPS (mass fraction).

| Sample               | Si (%) | C (%) | O (%) | N (%) | S (%) | F (%) |
|----------------------|--------|-------|-------|-------|-------|-------|
| Si-GPS               | 22.43  | 28.18 | 49.39 | -     | -     | -     |
| Si-E                 | 34.18  | 29.78 | 34.38 | 1.66  | -     | -     |
| Si-OH                | 17.66  | 20.49 | 58.20 | 3.66  | -     | -     |
| Si-NH <sub>2</sub>   | 14.93  | 36.36 | 44.59 | 4.12  | -     | -     |
| Si-SO <sub>3</sub> H | 18.74  | 30.61 | 48.05 | 2.29  | 2.30  | -     |
| Si-COOH              | 16.08  | 27.99 | 53.71 | 2.22  | -     | -     |
| Si-A                 | 18.01  | 50.44 | 30.06 | 1.48  | -     | -     |
| Si-B                 | 20.18  | 51.23 | 26.94 | 1.64  | -     | -     |
| Si-F                 | 19.27  | 46.11 | 29.26 | 1.21  | -     | 4.15  |

## Si-GPS

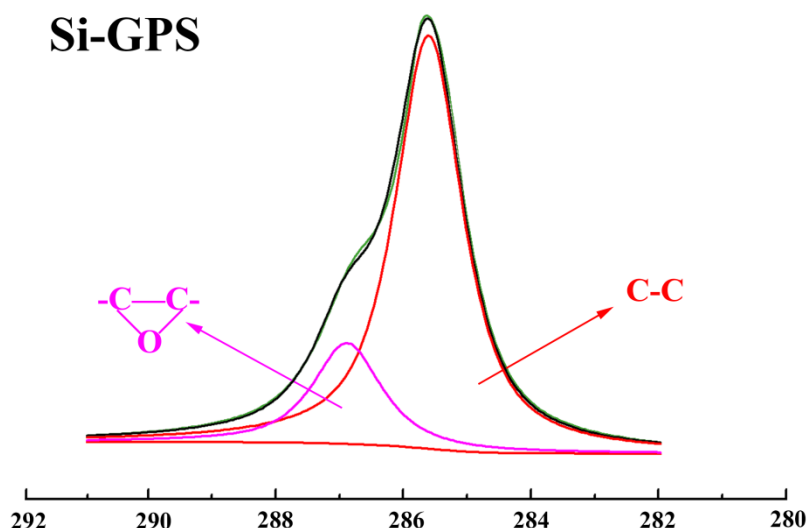

**Figure S1** Narrow-scan XPS C (1s) spectra for Si-GPS surface.

### Surface grafting density of different groups immobilized Si surface

The surface grafting density of the single-molecular-layer was very important to compare the data generated by different surface chemistries. In order to keep the grafting density in the same level, the reaction conditions of the Si wafer pretreatment and silanization procedure were the same. However, due to the different reaction activity of the functional groups, it was difficult to ensure that the grafting density was the same. The molar ratios of functional groups were calculated from XPS results in this study. The comparison of surface molar ratios of the functional groups could indicate the difference in the surface grafting density. Before grafting the groups, the substrates of Si-GPS were prepared under the same reaction conditions. Based on the XPS data of element N shown in Table 2S, the grafting molar ratios of Si-OH, Si-COOH, Si-SO<sub>3</sub>H, Si-E, Si-A, Si-B and Si-F were calculated to be 3.66%, 2.22%, 2.29%, 1.66%, 1.48%, 1.64% and 1.21%, respectively; since the functional groups were grafted onto the Si surfaces via the reaction between the amino groups and epoxy groups. For Si-NH<sub>2</sub>, the grafting molar ratios should be a half of the element N (2.06%), because two moles of element N existed in each ethanediamine molecule. By comparing the grafting molar ratios of the groups, it could be found that the grafting molar ratios were at the same level. Although the XPS results could reveal the surface grafting ratios of the functional groups, the results were rough, since the surface enrichment of the groups might affect the surface element contents.
